# Supplementary material
Source: publisher figshare collection journal article supplement (https://acs.figshare.com/ndownloader/files/5138833)
Supplement: Supplementary file 1 [file 5138833]

# Online Supporting Materials

**Table S1.** The  $\kappa$  values and ionic strength in solution of sodium formate at 25°C.

|          |       |       |       |       |       |       |       |       |       |
|----------|-------|-------|-------|-------|-------|-------|-------|-------|-------|
| Con. (M) | 0.12  | 0.1   | 0.08  | 0.06  | 0.04  | 0.02  | 0.015 | 0.01  | 0.005 |
| $I$ (M)  | 0.12  | 0.1   | 0.08  | 0.06  | 0.04  | 0.02  | 0.015 | 0.01  | 0.005 |
| (S/m)    | 1.012 | 0.860 | 0.702 | 0.539 | 0.370 | 0.192 | 0.145 | 0.098 | 0.050 |

The data of  $\kappa$  are used in Figure 2.

**Table S2.** The  $\kappa$  values and ionic strength in solution of sodium acetate at 25°C.

|                |       |       |       |       |       |       |       |       |       |       |
|----------------|-------|-------|-------|-------|-------|-------|-------|-------|-------|-------|
| Con. (M)       | 0.09  | 0.08  | 0.07  | 0.06  | 0.05  | 0.04  | 0.03  | 0.02  | 0.01  | 0.005 |
| $I$ (M)        | 0.09  | 0.08  | 0.07  | 0.06  | 0.05  | 0.04  | 0.03  | 0.02  | 0.01  | 0.005 |
| $\kappa$ (S/m) | 0.673 | 0.605 | 0.536 | 0.465 | 0.393 | 0.319 | 0.244 | 0.166 | 0.085 | 0.043 |

The data of  $\kappa$  are used in Figure 4.

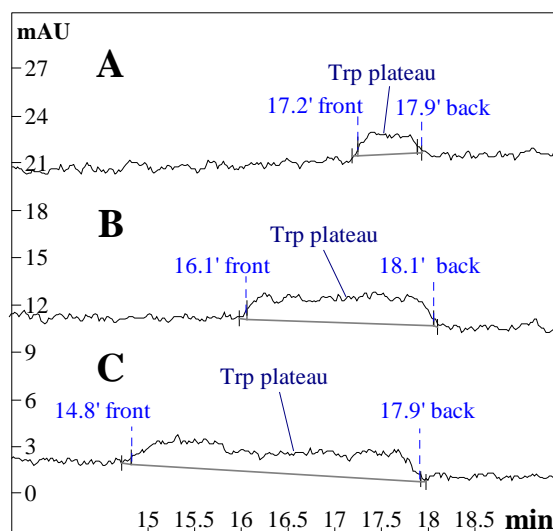

**Figure S1.** The stacking of 5.0  $\mu\text{g/ml}$  Trp in **A**: 60, **B**: 180 and **C**: 300 s 15 mbar pressure injection sample plugs by the boundary system of 30 mM pH 2.85 formate buffer (+,  $\alpha$ ) || 20 mM sodium formate (-,  $\beta$ ). The conditions (except for the sample injection time) are the same as those of Figure 5A. The panels show the unstacked Trp plateau, rather than the formic plateau occurring in Figure 5C-5F, 6 and S3-S4. The vertical dotted lines indicate the times of the “front” and “back” ends of the unstacked Trp plateau.

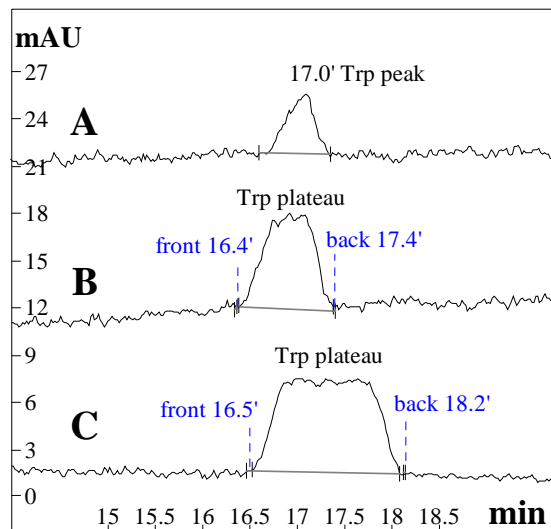

**Figure S2.** The stacking of 5.0 µg/ml Trp in **A**: 60, **B**: 180 and **C**: 300 s 15 mbar pressure injection sample plugs by the boundary system of 30 mM pH 2.85 formate buffer (+,  $\alpha$ ) || 40 mM sodium formate (-,  $\beta$ ). The conditions (except for sample injection time) are the same as those of Figure 5B. The panels show the partially stacked Trp peak/plateau. The vertical dotted lines indicate the times of the “front” and “back” ends of the partially stacked Trp plateau.

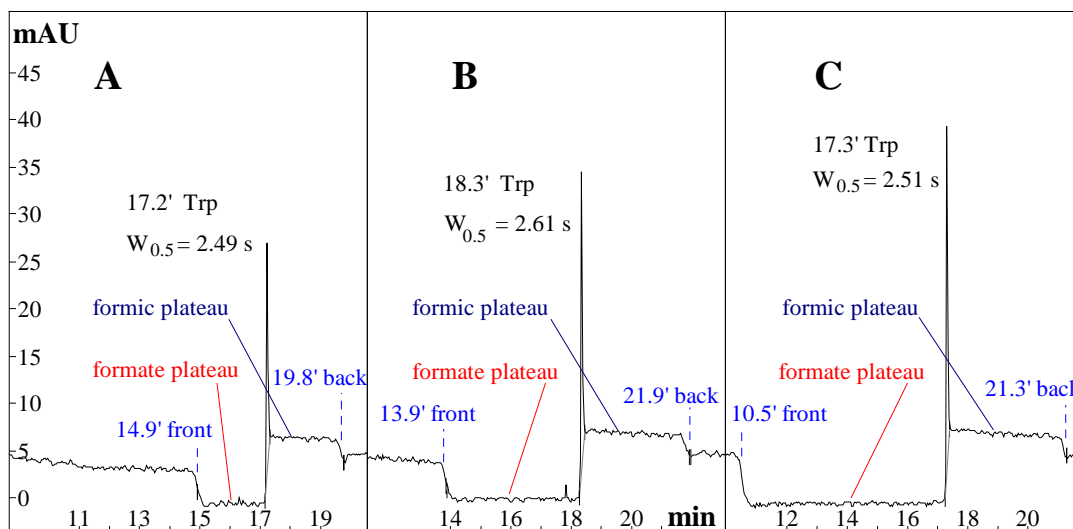

**Figure S3.** The stacking of 5.0 µg/ml Trp in **A**: 300, **B**: 420 and **C**: 540 s 15 mbar pressure injection sample plugs by the boundary system of 30 mM pH 2.85 formate buffer (+,  $\alpha$ ) || 80 mM sodium formate (-,  $\beta$ ). The conditions (except for the sample injection time) are the same as those of Figure 5D. The formic plateau indicates the original sample plug neutralized mainly as formic acid and the formate implies the unneutralized sodium formate in the sample plug. The vertical dotted lines indicate the times of the “front” and “back” ends of whole sample plug injected. The migration time and width ( $W_{0.5}$ ) of Trp peak are also given in the panels.

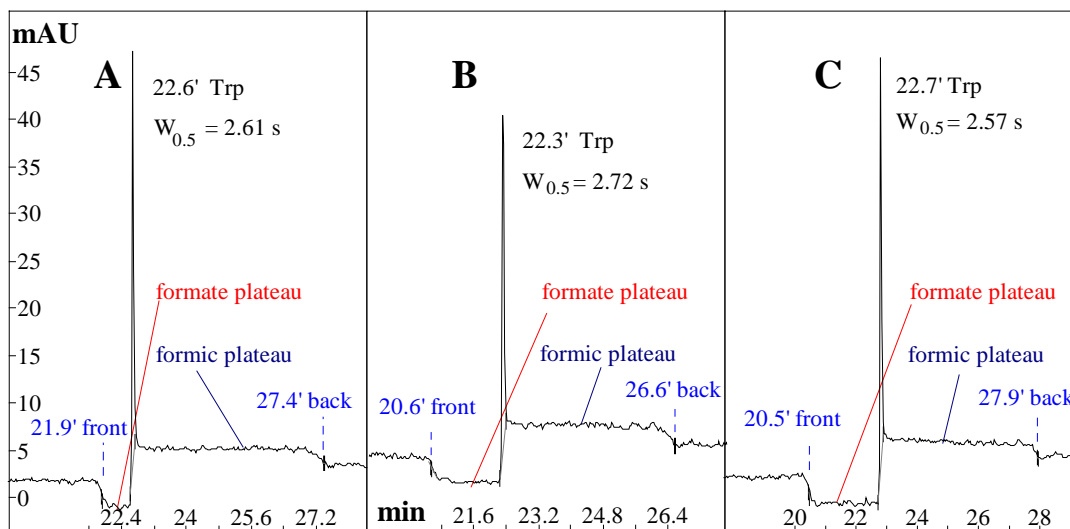

**Figure S4.** The stacking of 5.0 µg/ml Trp in **A**: 240, **B**: 300 and **C**: 360 s 15 mbar pressure injection sample plugs by the boundary of 30 mM pH 2.85 formate buffer (+,  $\alpha$ ) || 60 mM sodium formate (-,  $\beta$ ). The conditions (except for the sample injection time) are the same as those of Figure 5. The meanings of the texts and symbols in the panels are the same as these in Figure S3.

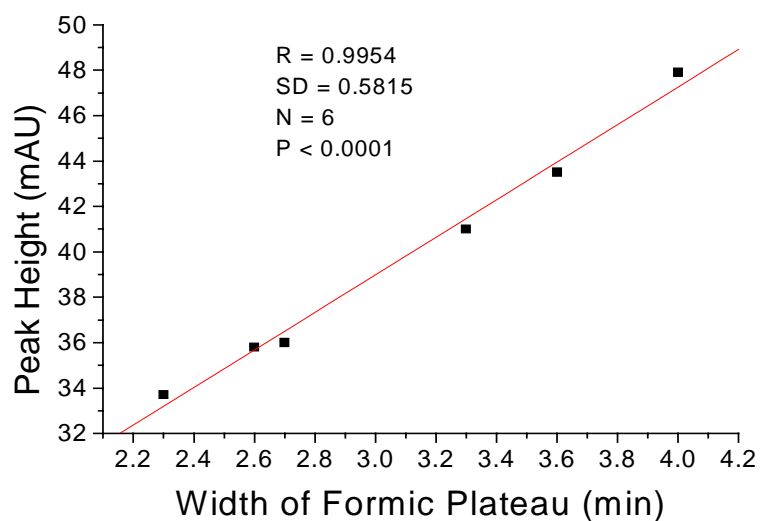

**Figure S5.** The correlations between the tightly stacked peak height of Trp and the width of formic plateau (viz., the length of stacked sample plug). The conditions are the same as these in Figure S3.

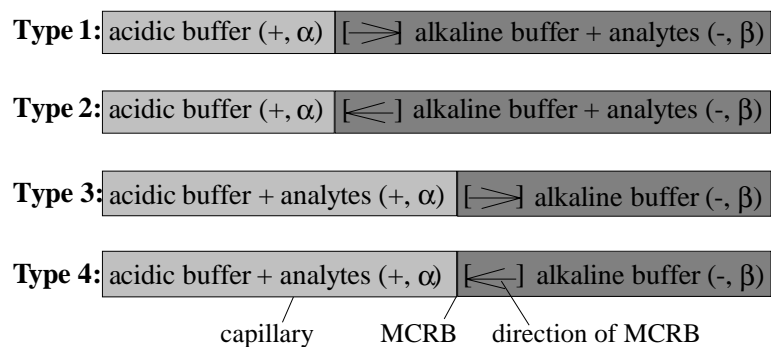

**Figure S6.** The four basic types of MCRB-induced stacking of zwitterion. The symbols of ‘[ $\rightarrow$ ]’ and ‘[ $\leftarrow$ ]’ above indicate the boundary moving toward the cathode and anode respectively. The ‘+’ and ‘-’ mean the anode and cathode respectively; the ‘ $\alpha$ ’ and ‘ $\beta$ ’ imply the phase  $\alpha$  and  $\beta$  respectively.
